# Supplementary material for: Local aromaticity of the five-membered rings in acenaphthylene derivatives
Source: Royal Society of Chemistry journal article supplement (doi:10.1039/c2cp41472d), 2012-01-01
Supplement: c2cp41472d.pdf [file c2cp41472d.pdf]

**Physical Chemistry Chemical Physics**

**ELECTRONIC SUPPLEMENTARY INFORMATION**

**Local aromaticity of the five-membered rings  
in acenaphthylene derivatives**

Slavko Radenković<sup>\*,†</sup>, Jelena Đurđević<sup>†</sup> and Patrick Bultinck<sup>‡</sup>

\*Corresponding author: E-mail: slavkoradenkovic@kg.ac.rs

<sup>†</sup>Faculty of Science, University of Kragujevac, P. O. Box 60, 34000 Kragujevac, Serbia

<sup>‡</sup>Department of Inorganic and Physical Chemistry, Ghent University, Krijgslaan 281  
(S3), 9000 Gent, Belgium

**Table S1.** Cartesian coordinates and energies (in Hartrees) of the molecules studied obtained at the B3LYP/6-311+G(d,p) level.

| <b>1</b>            |             |             |             |
|---------------------|-------------|-------------|-------------|
| <i>E</i> =-385.9889 |             |             |             |
| H                   | -3.37303900 | -1.24340700 | -0.00000100 |
| C                   | -2.43044400 | -0.70761400 | -0.00000100 |
| H                   | -1.24265300 | -2.48596400 | 0.00000000  |
| C                   | -1.24371400 | -1.40076200 | 0.00000000  |
| C                   | -1.24371400 | 1.40076200  | 0.00000000  |
| C                   | 0.00000000  | -0.71576500 | 0.00000000  |
| C                   | -2.43044400 | 0.70761400  | -0.00000100 |
| C                   | 0.00000000  | 0.71576500  | 0.00000000  |
| C                   | 1.24371400  | -1.40076300 | 0.00000000  |
| H                   | -3.37303900 | 1.24340700  | -0.00000100 |
| H                   | 1.24265300  | 2.48596500  | 0.00000100  |
| H                   | -1.24265300 | 2.48596400  | 0.00000000  |
| C                   | 2.43044400  | -0.70761400 | 0.00000100  |
| H                   | 1.24265200  | -2.48596500 | 0.00000000  |
| H                   | 3.37303900  | -1.24340600 | 0.00000100  |
| C                   | 2.43044400  | 0.70761400  | 0.00000100  |
| H                   | 3.37303900  | 1.24340600  | 0.00000100  |
| C                   | 1.24371400  | 1.40076300  | 0.00000100  |
| <b>1a</b>           |             |             |             |
| <i>E</i> =-462.1985 |             |             |             |
| H                   | -3.39422400 | -1.59268900 | 0.00002700  |
| C                   | -2.42669400 | -1.10284600 | 0.00001200  |
| H                   | -1.35949500 | -2.96031100 | 0.00001700  |
| C                   | -1.28159500 | -1.87812500 | 0.00000800  |
| C                   | -1.16046800 | 0.95020000  | -0.00001900 |
| C                   | 0.00000000  | -1.25423600 | -0.00001000 |
| C                   | -2.38777300 | 0.32092300  | 0.00000000  |
| C                   | 0.00000000  | 0.14036300  | -0.00002700 |
| C                   | 1.28159500  | -1.87812500 | 0.00000100  |
| H                   | -3.31841500 | 0.87885200  | 0.00001400  |
| C                   | 2.42669500  | -1.10284600 | 0.00000600  |
| H                   | 1.35949500  | -2.96031100 | 0.00000900  |
| H                   | 3.39422400  | -1.59269100 | 0.00001800  |
| C                   | 2.38777400  | 0.32092200  | 0.00000000  |
| H                   | 3.31841400  | 0.87885300  | 0.00002000  |
| C                   | 1.16046700  | 0.95019900  | -0.00001500 |
| C                   | 0.68117900  | 2.34268300  | 0.00001600  |
| H                   | 1.31546500  | 3.21875700  | 0.00003300  |
| C                   | -0.68117900 | 2.34268400  | 0.00000300  |
| H                   | -1.31546300 | 3.21875800  | 0.00001000  |

| <b>2</b>            |             |             |             |
|---------------------|-------------|-------------|-------------|
| <i>E</i> =-539.6602 |             |             |             |
| H                   | -4.60040000 | 1.24481600  | -0.00000100 |
| C                   | -3.65593200 | 0.71240900  | 0.00000000  |
| H                   | -2.47661500 | 2.49042200  | -0.00000200 |
| C                   | -2.47701300 | 1.40532900  | -0.00000100 |
| C                   | -2.47701300 | -1.40532900 | 0.00000000  |
| C                   | -1.22212100 | 0.72156900  | 0.00000000  |
| C                   | -3.65593200 | -0.71240900 | 0.00000000  |
| C                   | -1.22212100 | -0.72156900 | 0.00000000  |
| C                   | 0.00000000  | 1.40196100  | 0.00000000  |
| H                   | -4.60040000 | -1.24481600 | 0.00000100  |
| H                   | 0.00000000  | -2.48791100 | 0.00000100  |
| H                   | -2.47661600 | -2.49042200 | 0.00000100  |
| C                   | 1.22212100  | 0.72156900  | 0.00000000  |
| H                   | 0.00000000  | 2.48791100  | -0.00000100 |
| C                   | 2.47701300  | 1.40532900  | -0.00000100 |
| C                   | 1.22212100  | -0.72156900 | 0.00000100  |
| H                   | 2.47661500  | -2.49042200 | 0.00000100  |
| C                   | 0.00000000  | -1.40196100 | 0.00000100  |
| C                   | 3.65593200  | 0.71240900  | 0.00000100  |
| H                   | 2.47661600  | 2.49042200  | -0.00000100 |
| H                   | 4.60040000  | 1.24481600  | 0.00000100  |
| C                   | 3.65593200  | -0.71240900 | 0.00000000  |
| H                   | 4.60040000  | -1.24481600 | 0.00000100  |
| C                   | 2.47701300  | -1.40532900 | 0.00000000  |
| <b>2a</b>           |             |             |             |
| <i>E</i> =-615.8707 |             |             |             |
| H                   | -4.85920700 | -1.09122500 | 0.00002100  |
| C                   | -3.86477800 | -0.65964300 | 0.00001800  |
| H                   | -2.87719300 | -2.54898000 | 0.00002100  |
| C                   | -2.76281400 | -1.46988300 | 0.00001900  |
| C                   | -2.46940900 | 1.32437300  | 0.00000000  |
| C                   | -1.43967400 | -0.92831000 | 0.00001400  |
| C                   | -3.71478600 | 0.75483700  | 0.00000700  |
| C                   | -1.29250100 | 0.52075600  | 0.00001100  |
| C                   | -0.31733100 | -1.77845500 | 0.00000400  |
| H                   | -4.59831000 | 1.38354300  | 0.00000200  |
| H                   | -2.36404900 | 2.40327700  | -0.00001200 |
| C                   | 0.98449300  | -1.25259500 | -0.00000800 |
| H                   | -0.47494500 | -2.85270000 | 0.00000600  |
| C                   | 2.22104400  | -1.97587700 | -0.00001800 |
| C                   | 1.09025400  | 0.14737300  | -0.00000900 |
| C                   | 0.01460600  | 1.03923200  | -0.00000600 |
| C                   | 3.41738200  | -1.29430800 | -0.00002200 |
| H                   | 2.21218200  | -3.06071300 | -0.00001900 |

|                                  |             |             |             |
|----------------------------------|-------------|-------------|-------------|
| H                                | 4.34529900  | -1.85546100 | -0.00002000 |
| C                                | 3.48929800  | 0.13578600  | -0.00001600 |
| H                                | 4.46236000  | 0.61620200  | 0.00000500  |
| C                                | 2.32262300  | 0.86152800  | -0.00000200 |
| C                                | 1.96180800  | 2.28424000  | 0.00007400  |
| H                                | 2.66285200  | 3.10738600  | 0.00013100  |
| C                                | 0.60099500  | 2.38824200  | -0.00007100 |
| H                                | 0.04374800  | 3.31489400  | -0.00011400 |
| <b>3</b><br><i>E</i> =-693.3292  |             |             |             |
| C                                | -2.44709300 | -0.72496000 | -0.00000300 |
| H                                | -1.23436800 | -2.49066400 | -0.00000900 |
| C                                | -1.23400900 | -1.40482900 | -0.00000600 |
| C                                | -1.23400800 | 1.40482900  | -0.00000200 |
| C                                | 0.00000200  | -0.72509400 | -0.00000400 |
| C                                | -2.44709300 | 0.72496200  | -0.00000200 |
| C                                | 0.00000200  | 0.72509200  | -0.00000200 |
| C                                | 1.23400500  | -1.40483000 | -0.00000400 |
| H                                | 1.23436700  | 2.49066400  | 0.00000400  |
| H                                | -1.23436400 | 2.49066400  | -0.00000400 |
| C                                | 2.44709500  | -0.72495800 | -0.00000100 |
| H                                | 1.23436800  | -2.49066400 | -0.00000700 |
| C                                | 3.70723100  | -1.40762600 | 0.00000000  |
| C                                | 2.44709500  | 0.72495800  | 0.00000200  |
| H                                | 3.70732600  | 2.49269200  | 0.00000900  |
| C                                | 1.23400500  | 1.40482900  | 0.00000100  |
| C                                | 4.88264000  | -0.71478200 | 0.00000300  |
| H                                | 3.70732700  | -2.49269200 | -0.00000300 |
| H                                | 5.82797700  | -1.24559500 | 0.00000400  |
| C                                | 4.88264000  | 0.71478300  | 0.00000700  |
| H                                | 5.82797700  | 1.24559600  | 0.00001100  |
| C                                | 3.70723100  | 1.40762700  | 0.00000700  |
| C                                | -3.70723300 | 1.40762800  | -0.00000100 |
| H                                | -3.70732900 | 2.49269400  | -0.00000200 |
| C                                | -4.88263900 | 0.71478400  | 0.00000100  |
| H                                | -5.82797800 | 1.24559300  | -0.00000100 |
| C                                | -4.88263900 | -0.71478500 | 0.00000300  |
| H                                | -5.82797900 | -1.24559400 | 0.00000700  |
| C                                | -3.70723300 | -1.40762800 | 0.00000100  |
| H                                | -3.70732400 | -2.49269400 | 0.00000200  |
| <b>3a</b><br><i>E</i> =-769.5402 |             |             |             |
| C                                | 2.61178500  | 0.65338900  | -0.00009100 |
| H                                | 1.27134200  | 2.32175400  | -0.00063200 |
| C                                | 1.34773300  | 1.23964000  | -0.00048400 |
| C                                | 1.56751200  | -1.56056900 | -0.00010600 |

|                                  |             |             |             |
|----------------------------------|-------------|-------------|-------------|
| C                                | 0.17076400  | 0.47406400  | -0.00075700 |
| C                                | 2.72523200  | -0.78975300 | 0.00004400  |
| C                                | 0.28036500  | -0.98618900 | -0.00043700 |
| C                                | -1.13530400 | 1.02251200  | -0.00104800 |
| H                                | -0.74452700 | -2.88680600 | -0.00009400 |
| H                                | 1.65476900  | -2.64291300 | 0.00003600  |
| C                                | -2.22431600 | 0.15799400  | -0.00092900 |
| C                                | -3.44426800 | 0.90132500  | -0.00020200 |
| C                                | -2.15367700 | -1.24959400 | -0.00045800 |
| H                                | -3.42786100 | -3.02732900 | 0.00022200  |
| C                                | -0.87442900 | -1.80897300 | -0.00026600 |
| C                                | -4.62462100 | 0.20243100  | 0.00061900  |
| H                                | -5.58682500 | 0.70427700  | 0.00168400  |
| C                                | -4.58749700 | -1.23276000 | 0.00068200  |
| H                                | -5.52953300 | -1.76980500 | 0.00126900  |
| C                                | -3.41080000 | -1.94266800 | 0.00016600  |
| C                                | 4.03303600  | -1.37531100 | 0.00036400  |
| H                                | 4.11526300  | -2.45726800 | 0.00044800  |
| C                                | 5.15230500  | -0.59464200 | 0.00054000  |
| H                                | 6.13594800  | -1.05032800 | 0.00077100  |
| C                                | 5.04035700  | 0.82974400  | 0.00042900  |
| H                                | 5.94158000  | 1.43255800  | 0.00061400  |
| C                                | 3.81446100  | 1.43068000  | 0.00011200  |
| H                                | 3.73142800  | 2.51247300  | 0.00003100  |
| C                                | -3.05302900 | 2.31380800  | 0.00055400  |
| H                                | -3.73399300 | 3.15341000  | 0.00129500  |
| C                                | -1.68863100 | 2.38371100  | 0.00025600  |
| H                                | -1.10945600 | 3.29693500  | 0.00042700  |
| <b>3b</b><br><i>E</i> =-769.5411 |             |             |             |
| C                                | 4.88337200  | -0.91349400 | -0.00001500 |
| H                                | 3.75194400  | -2.71842000 | -0.00000600 |
| C                                | 3.72357100  | -1.63368000 | -0.00000800 |
| C                                | 3.65089200  | 1.17888500  | -0.00001800 |
| C                                | 2.44367600  | -0.98899200 | -0.00000300 |
| C                                | 2.41014100  | 0.47234600  | -0.00000600 |
| C                                | 1.26488600  | -1.74558000 | 0.00000000  |
| H                                | 3.63159900  | 2.26260000  | -0.00002400 |
| C                                | 0.00006900  | -1.11760700 | 0.00000100  |
| H                                | 1.33552700  | -2.82890800 | 0.00000000  |
| C                                | -1.26499800 | -1.74560700 | 0.00000300  |
| C                                | 0.00007700  | 0.29167100  | 0.00000000  |
| C                                | 1.15524200  | 1.09522600  | -0.00000600 |
| H                                | -1.33532600 | -2.82897400 | 0.00000300  |
| C                                | -1.15538600 | 1.09525200  | 0.00000500  |
| C                                | -0.68424300 | 2.48215900  | 0.00003000  |

|                     |             |             |             |
|---------------------|-------------|-------------|-------------|
| H                   | -1.31174300 | 3.36241400  | 0.00005200  |
| C                   | 0.68410300  | 2.48215800  | -0.00003200 |
| H                   | 1.31162300  | 3.36240200  | -0.00005400 |
| C                   | -2.41001400 | 0.47231400  | 0.00000500  |
| C                   | -2.44356600 | -0.98925600 | 0.00000400  |
| C                   | -3.72372200 | -1.63372700 | 0.00001000  |
| C                   | -4.88332100 | -0.91358200 | 0.00001600  |
| C                   | -3.65089100 | 1.17892100  | 0.00001600  |
| H                   | -3.63137100 | 2.26263700  | 0.00002100  |
| H                   | -3.75203900 | -2.71850000 | 0.00001000  |
| C                   | -4.84438300 | 0.51223500  | 0.00002000  |
| C                   | 4.84449200  | 0.51204600  | -0.00002100 |
| H                   | -5.77569200 | 1.06773600  | 0.00002700  |
| H                   | -5.84154900 | -1.42035200 | 0.00002100  |
| H                   | 5.77561600  | 1.06787200  | -0.00002900 |
| H                   | 5.84141600  | -1.42063800 | -0.00001900 |
| <b>4</b>            |             |             |             |
| <i>E</i> =-846.9969 |             |             |             |
| C                   | 3.67357200  | -0.72679600 | -0.00000400 |
| H                   | 2.46544900  | -2.49223200 | 0.00000300  |
| C                   | 2.46479600  | -1.40643100 | 0.00000000  |
| C                   | 2.46479800  | 1.40643200  | -0.00000800 |
| C                   | 1.22479400  | -0.72753700 | 0.00000000  |
| C                   | 3.67357300  | 0.72679500  | -0.00000800 |
| C                   | 1.22479500  | 0.72754000  | -0.00000400 |
| C                   | -0.00000400 | -1.40697300 | 0.00000400  |
| H                   | 0.00000300  | 2.49268700  | -0.00000800 |
| H                   | 2.46545400  | 2.49223300  | -0.00001100 |
| C                   | -1.22478700 | -0.72753600 | 0.00000400  |
| H                   | -0.00000100 | -2.49268200 | 0.00000700  |
| C                   | -2.46480200 | -1.40643000 | 0.00000900  |
| C                   | -1.22478500 | 0.72754400  | -0.00000100 |
| H                   | -2.46545400 | 2.49223500  | -0.00000500 |
| C                   | -0.00000300 | 1.40697800  | -0.00000500 |
| C                   | -3.67356900 | -0.72680400 | 0.00000900  |
| H                   | -2.46544200 | -2.49223300 | 0.00001200  |
| C                   | -3.67356600 | 0.72680000  | 0.00000300  |
| C                   | -2.46480500 | 1.40643300  | -0.00000100 |
| C                   | 4.93630400  | 1.40886500  | -0.00001200 |
| H                   | 4.93666500  | 2.49392000  | -0.00001600 |
| C                   | 6.10997500  | 0.71601100  | -0.00001200 |
| H                   | 7.05576000  | 1.24600000  | -0.00001500 |
| C                   | 6.10997500  | -0.71601500 | -0.00000800 |
| H                   | 7.05575900  | -1.24600600 | -0.00000800 |
| C                   | 4.93630300  | -1.40886800 | -0.00000400 |
| H                   | 4.93666200  | -2.49392300 | -0.00000100 |

|                     |             |             |             |
|---------------------|-------------|-------------|-------------|
| C                   | -4.93630800 | -1.40887000 | 0.00001500  |
| H                   | -4.93665900 | -2.49392600 | 0.00002000  |
| C                   | -4.93630800 | 1.40886700  | 0.00000200  |
| H                   | -4.93666400 | 2.49392300  | -0.00000400 |
| C                   | -6.10997300 | 0.71601600  | 0.00000800  |
| H                   | -7.05576300 | 1.24599800  | 0.00000500  |
| C                   | -6.10997400 | -0.71601900 | 0.00001500  |
| H                   | -7.05576300 | -1.24600100 | 0.00002200  |
| <b>4a</b>           |             |             |             |
| <i>E</i> =-923.2082 |             |             |             |
| C                   | -3.34363900 | -1.23397800 | -0.00009200 |
| H                   | -1.96862600 | -2.89648700 | -0.00003200 |
| C                   | -2.07891800 | -1.81646200 | -0.00009000 |
| C                   | -2.28892900 | 1.02271600  | -0.00016400 |
| C                   | -0.90381900 | -1.01453100 | -0.00010500 |
| C                   | -3.38887500 | 0.17773000  | -0.00018000 |
| C                   | -0.98659900 | 0.45294600  | -0.00011100 |
| C                   | 0.36320700  | -1.61314800 | -0.00007900 |
| H                   | 0.13889300  | 2.27839100  | -0.00006800 |
| C                   | 1.54651400  | -0.86362100 | -0.00004400 |
| H                   | 0.43012700  | -2.69684100 | -0.00007800 |
| C                   | 2.82219800  | -1.47211900 | -0.00000100 |
| C                   | 1.46038200  | 0.58685000  | -0.00003900 |
| H                   | 2.59625100  | 2.41931700  | -0.00002200 |
| C                   | 0.19529500  | 1.19515000  | -0.00007000 |
| C                   | 3.99032900  | -0.72424200 | 0.00002700  |
| H                   | 2.88419800  | -2.55614300 | 0.00000900  |
| C                   | 3.90490300  | 0.72598800  | 0.00001200  |
| C                   | 2.65761900  | 1.33535800  | -0.00001800 |
| C                   | -4.59861100 | 0.94173700  | -0.00001600 |
| C                   | -5.78902900 | 0.26250500  | 0.000020500 |
| H                   | -6.74272200 | 0.78049300  | 0.000040600 |
| C                   | -5.77710500 | -1.17496300 | 0.00018500  |
| H                   | -6.72862800 | -1.69491800 | 0.00033200  |
| C                   | -4.61412000 | -1.90494300 | 0.00004100  |
| H                   | -4.64988400 | -2.98915100 | 0.00006800  |
| C                   | 5.28999500  | -1.33264200 | 0.00007100  |
| H                   | 5.35275700  | -2.41587500 | 0.00008300  |
| C                   | 5.12540400  | 1.48005600  | 0.00004100  |
| H                   | 5.06287500  | 2.56324700  | 0.00003000  |
| C                   | 6.33760400  | 0.85614900  | 0.00007900  |
| H                   | 7.25084700  | 1.44050900  | 0.00009900  |
| C                   | 6.42169400  | -0.57294100 | 0.00009600  |
| H                   | 7.39685800  | -1.04659500 | 0.00012900  |
| C                   | -4.18460200 | 2.34709500  | 0.00011700  |
| H                   | -4.85126500 | 3.19800000  | 0.00003800  |

|                                  |             |             |             |
|----------------------------------|-------------|-------------|-------------|
| C                                | -2.81892700 | 2.39272900  | -0.00001000 |
| H                                | -2.22349000 | 3.29553600  | -0.00012800 |
| <b>4b</b><br><i>E</i> =-923.2098 |             |             |             |
| H                                | 6.95322300  | -1.48646800 | -0.00004600 |
| C                                | 6.00174700  | -0.96719200 | -0.00004100 |
| H                                | 4.84665700  | -2.75609700 | -0.00003900 |
| C                                | 4.83351500  | -1.67107500 | -0.00003800 |
| C                                | 4.79878900  | 1.14417100  | -0.00002500 |
| C                                | 3.56066300  | -1.00889600 | -0.00003100 |
| C                                | 5.98163900  | 0.46066100  | -0.00003300 |
| C                                | 3.54626700  | 0.45573800  | -0.00002900 |
| C                                | 2.37527400  | -1.74872300 | -0.00001900 |
| H                                | 4.79474400  | 2.22797900  | -0.00001600 |
| C                                | 1.11486700  | -1.10345200 | -0.00000500 |
| H                                | 2.43047900  | -2.83291500 | -0.00001800 |
| C                                | -0.14866400 | -1.71731700 | 0.00001000  |
| C                                | 1.13170600  | 0.30933800  | -0.00000700 |
| C                                | 2.30370400  | 1.09728600  | -0.00001300 |
| H                                | -0.23129700 | -2.79975700 | 0.00001300  |
| C                                | -0.00510400 | 1.12722600  | -0.00000300 |
| C                                | 0.48451000  | 2.50556800  | -0.00005800 |
| H                                | -0.13125500 | 3.39424800  | -0.00008900 |
| C                                | 1.85450900  | 2.48877600  | 0.00003900  |
| H                                | 2.49358200  | 3.36047500  | 0.00007000  |
| C                                | -1.27995100 | 0.52143000  | 0.00001400  |
| C                                | -1.32921100 | -0.94617000 | 0.00002100  |
| C                                | -2.59525800 | -1.57525700 | 0.00002900  |
| C                                | -3.78121800 | -0.85534200 | 0.00003100  |
| C                                | -2.49313000 | 1.23421600  | 0.00000900  |
| H                                | -2.46380000 | 2.31854500  | -0.00000200 |
| H                                | -2.63564700 | -2.66039200 | 0.00003100  |
| C                                | -3.72799500 | 0.59441800  | 0.00002000  |
| C                                | -4.96454300 | 1.31934400  | 0.00001900  |
| C                                | -6.16250700 | 0.66672000  | 0.00002900  |
| H                                | -7.08888200 | 1.23015000  | 0.00002800  |
| C                                | -6.21483600 | -0.76315200 | 0.00004000  |
| H                                | -7.17891600 | -1.25883900 | 0.00004700  |
| C                                | -5.06494900 | -1.49559200 | 0.00004000  |
| H                                | -5.10087000 | -2.58008900 | 0.00004800  |
| H                                | -4.92757900 | 2.40366900  | 0.00001100  |
| H                                | 6.92061200  | 1.00316400  | -0.00003200 |
| <b>5</b><br><i>E</i> =-1000.6640 |             |             |             |
| C                                | -2.45113800 | 0.72889000  | -0.00018100 |
| H                                | -1.23118100 | 2.49388200  | -0.00021900 |



|                      |             |             |             |
|----------------------|-------------|-------------|-------------|
| C                    | -1.23100500 | 1.40823800  | -0.00017100 |
| C                    | -1.23101700 | -1.40819000 | -0.00010400 |
| C                    | 0.00002300  | 0.72943100  | -0.00013300 |
| C                    | -2.45123500 | -0.72884400 | -0.00017100 |
| C                    | -0.00003400 | -0.72940900 | -0.00006300 |
| C                    | 1.23093100  | 1.40821700  | -0.00014700 |
| H                    | 1.23119100  | -2.49385400 | 0.00012300  |
| H                    | -1.23137500 | -2.49383300 | -0.00007900 |
| C                    | 2.45118600  | 0.72883700  | -0.00004400 |
| H                    | 1.23128900  | 2.49385700  | -0.00020300 |
| C                    | 3.69433100  | 1.40738200  | -0.00004500 |
| C                    | 2.45116000  | -0.72884800 | 0.00005600  |
| H                    | 3.69515500  | -2.49316200 | 0.00017600  |
| C                    | 1.23093600  | -1.40821600 | 0.00004700  |
| C                    | 4.90086500  | 0.72772200  | 0.00002200  |
| H                    | 3.69519600  | 2.49314200  | -0.00010900 |
| C                    | 4.90085600  | -0.72774500 | 0.00010300  |
| C                    | 3.69433700  | -1.40740400 | 0.00012500  |
| C                    | -3.69446500 | -1.40739800 | -0.00028900 |
| H                    | -3.69537300 | -2.49313300 | -0.00037500 |
| C                    | -4.90082900 | 0.72775800  | -0.00013400 |
| C                    | -3.69429200 | 1.40736900  | -0.00015500 |
| H                    | -3.69508400 | 2.49316900  | -0.00010100 |
| C                    | 6.16504500  | 1.40956600  | 0.00001200  |
| H                    | 6.16526600  | 2.49461200  | -0.00004100 |
| C                    | 6.16505000  | -1.40959100 | 0.00015400  |
| H                    | 6.16525600  | -2.49463700 | 0.00020300  |
| C                    | 7.33778100  | -0.71671900 | 0.00014000  |
| H                    | 8.28390400  | -1.24612500 | 0.00018100  |
| C                    | 7.33778300  | 0.71669700  | 0.00007100  |
| H                    | 8.28390300  | 1.24610800  | 0.00006500  |
| C                    | -6.16491700 | 1.40961400  | 0.00028000  |
| C                    | -7.33773400 | 0.71673800  | 0.00056200  |
| C                    | -7.33772200 | -0.71668300 | 0.00027900  |
| C                    | -6.16506100 | -1.40956200 | -0.00003300 |
| C                    | -4.90083000 | -0.72784700 | -0.00029900 |
| H                    | -6.16512700 | 2.49462400  | 0.00020700  |
| H                    | -8.28382700 | 1.24616200  | 0.00107000  |
| H                    | -8.28380400 | -1.24616200 | 0.00012300  |
| H                    | -6.16541900 | -2.49465500 | -0.00031800 |
| <b>5a</b>            |             |             |             |
| <i>E</i> =-1076.8755 |             |             |             |
| C                    | -2.80053200 | -0.79692500 | -0.00000800 |
| H                    | -1.65894500 | -2.61441000 | -0.00002200 |
| C                    | -1.61149200 | -1.52977000 | -0.00002900 |
| C                    | -1.48300300 | 1.28322000  | -0.00004400 |

|                      |             |             |             |
|----------------------|-------------|-------------|-------------|
| C                    | -0.35291800 | -0.90432900 | -0.00005900 |
| C                    | -2.73400700 | 0.65870600  | -0.00001500 |
| C                    | -0.28529400 | 0.55121100  | -0.00006600 |
| C                    | 0.84549900  | -1.63870200 | -0.00008400 |
| H                    | 1.02145700  | 2.25795300  | -0.00012900 |
| H                    | -1.43544100 | 2.36774400  | -0.00004900 |
| C                    | 2.10044400  | -1.02407600 | -0.00011300 |
| H                    | 0.79229800  | -2.72313100 | -0.00008200 |
| C                    | 3.28787100  | -1.81182900 | -0.00009100 |
| C                    | 2.16498300  | 0.44738700  | -0.00012600 |
| C                    | 0.97846900  | 1.17411900  | -0.00010600 |
| C                    | 4.54340100  | -1.21415600 | -0.00011500 |
| H                    | 3.19058100  | -2.89310300 | 0.00000400  |
| C                    | 4.57153100  | 0.19967100  | -0.00022700 |
| C                    | 3.46380900  | 1.03165200  | -0.00017700 |
| C                    | -3.94484300 | 1.39161300  | 0.00000800  |
| H                    | -3.89743600 | 2.47628700  | 0.00000700  |
| C                    | -5.24718700 | -0.68722300 | 0.00003800  |
| C                    | -4.07206800 | -1.42007500 | 0.00001900  |
| H                    | -4.12094000 | -2.50473700 | 0.00002400  |
| C                    | 5.82239900  | -1.87010000 | 0.00009200  |
| H                    | 5.87082200  | -2.95380700 | 0.00013800  |
| C                    | 5.77378400  | 0.97766400  | -0.00003000 |
| C                    | 6.97112200  | 0.31182100  | 0.00023800  |
| H                    | 7.91897300  | 0.84046600  | 0.00044000  |
| C                    | 6.97612800  | -1.12665600 | 0.00025300  |
| H                    | 7.93383700  | -1.63510400 | 0.00042800  |
| C                    | -6.54045100 | -1.31188200 | 0.00006100  |
| C                    | -7.68093900 | -0.56702000 | 0.00008100  |
| C                    | -7.61601800 | 0.86463200  | 0.00007700  |
| C                    | -6.41316200 | 1.50423600  | 0.00005500  |
| C                    | -5.18124300 | 0.76632200  | 0.00003400  |
| H                    | -6.58932100 | -2.39582100 | 0.00006400  |
| H                    | -8.64998400 | -1.05311000 | 0.00009800  |
| H                    | -8.53723200 | 1.43629800  | 0.00009300  |
| H                    | -6.36474800 | 2.58816500  | 0.00005200  |
| C                    | 5.34445600  | 2.37778200  | 0.00007000  |
| H                    | 6.00146900  | 3.23609500  | 0.00011800  |
| C                    | 3.97802100  | 2.40723700  | 0.00004800  |
| H                    | 3.37205100  | 3.30303900  | 0.00011200  |
| <b>5b</b>            |             |             |             |
| <i>E</i> =-1076.8774 |             |             |             |
| C                    | -2.62699400 | -0.85939700 | -0.00008100 |
| H                    | -1.46739800 | -2.66295100 | -0.00016300 |
| C                    | -1.42897900 | -1.57789600 | -0.00011300 |
| C                    | -1.33030000 | 1.23563800  | 0.00003700  |

|                      |             |             |             |
|----------------------|-------------|-------------|-------------|
| C                    | -0.17300400 | -0.94619300 | -0.00007600 |
| C                    | -2.57642100 | 0.59490300  | -0.00000400 |
| C                    | -0.12529000 | 0.52594000  | 0.00000200  |
| C                    | 1.01313400  | -1.71731300 | -0.00009800 |
| H                    | 5.95559600  | 2.22620800  | 0.00012000  |
| H                    | -1.30230800 | 2.31988100  | 0.00009700  |
| C                    | 2.27218800  | -1.10275200 | -0.00004700 |
| H                    | 0.93093600  | -2.79976400 | -0.00013600 |
| C                    | 3.53404400  | -1.74922000 | -0.00002400 |
| C                    | 2.28852800  | 0.31201600  | 0.00000100  |
| C                    | 1.15632500  | 1.13027500  | 0.00004200  |
| C                    | 4.71807100  | -1.01035400 | 0.00004300  |
| H                    | 3.58818000  | -2.83342300 | -0.00004700 |
| C                    | 4.70433400  | 0.45564000  | 0.00008000  |
| C                    | 3.46426100  | 1.09929600  | 0.00004700  |
| C                    | -3.79455500 | 1.31193500  | 0.00003100  |
| H                    | -3.76118600 | 2.39705700  | 0.00008900  |
| C                    | -5.07392300 | -0.78264500 | -0.00008400 |
| C                    | -3.88906100 | -1.50034400 | -0.00011800 |
| H                    | -3.92309300 | -2.58559400 | -0.00017400 |
| C                    | 5.99119600  | -1.67382500 | 0.00006700  |
| H                    | 6.00314300  | -2.75882800 | 0.00003600  |
| C                    | 5.95843900  | 1.14243800  | 0.00011300  |
| C                    | 7.13988300  | 0.45769100  | 0.00013800  |
| H                    | 8.07941100  | 0.99922800  | 0.00017000  |
| C                    | 7.15934800  | -0.97113800 | 0.00011500  |
| H                    | 8.11066100  | -1.49059700 | 0.00012800  |
| C                    | -6.35876200 | -1.42358100 | -0.00012100 |
| C                    | -7.50850100 | -0.69269900 | -0.00008500 |
| C                    | -7.45992200 | 0.73905200  | -0.00001000 |
| C                    | -6.26454100 | 1.39352500  | 0.00002800  |
| C                    | -5.02443900 | 0.67083000  | -0.00000700 |
| H                    | -6.39400600 | -2.50804700 | -0.00017800 |
| H                    | -8.47168100 | -1.19020800 | -0.00011400 |
| H                    | -8.38773000 | 1.29999400  | 0.00001800  |
| H                    | -6.22953100 | 2.47791800  | 0.00008600  |
| C                    | 3.01806700  | 2.48988600  | -0.00003200 |
| H                    | 3.65720200  | 3.36141400  | -0.00008900 |
| C                    | 1.64684900  | 2.50687200  | 0.00014700  |
| H                    | 1.03197300  | 3.39623500  | 0.00021300  |
| <b>5c</b>            |             |             |             |
| <i>E</i> =-1076.8781 |             |             |             |
| C                    | -4.89997900 | -0.88699500 | 0.00002800  |
| H                    | -3.72998900 | -2.67514200 | 0.00002400  |
| C                    | -3.70547700 | -1.58955400 | 0.00002400  |
| C                    | -3.64236300 | 1.22239900  | 0.00001700  |

|   |             |             |             |
|---|-------------|-------------|-------------|
| C | -2.44647900 | -0.94207500 | 0.00001900  |
| C | -2.41680500 | 0.52822000  | 0.00001800  |
| C | -1.25913200 | -1.69641200 | 0.00000900  |
| H | -3.62901800 | 2.30696900  | 0.00001200  |
| C | -0.00003300 | -1.06467300 | -0.00000200 |
| H | -1.32623600 | -2.77988500 | 0.00000700  |
| C | 1.25919700  | -1.69643200 | -0.00001500 |
| C | -0.00004700 | 0.35081800  | 0.00000100  |
| C | -1.15386600 | 1.15339400  | 0.00000700  |
| H | 1.32617400  | -2.77992000 | -0.00001800 |
| C | 1.15394900  | 1.15338400  | -0.00000300 |
| C | 0.68621700  | 2.53606700  | 0.00004100  |
| H | 1.31356900  | 3.41644200  | 0.00006700  |
| C | -0.68609600 | 2.53607900  | -0.00003000 |
| H | -1.31345500 | 3.41645300  | -0.00005100 |
| C | 2.41673000  | 0.52816600  | -0.00001700 |
| C | 2.44638700  | -0.94219000 | -0.00002300 |
| C | 3.70555700  | -1.58960200 | -0.00003000 |
| C | 4.89992400  | -0.88708900 | -0.00003100 |
| C | 3.64239400  | 1.22236300  | -0.00001300 |
| H | 3.62897400  | 2.30693300  | -0.00000300 |
| H | 3.72997400  | -2.67520400 | -0.00003200 |
| C | 4.86643400  | 0.56473400  | -0.00002200 |
| C | 6.11407900  | 1.27179800  | -0.00002100 |
| C | 7.30202600  | 0.60214500  | -0.00002900 |
| H | 8.23635500  | 1.15229800  | -0.00002800 |
| C | 7.33477500  | -0.82929400 | -0.00003900 |
| H | 8.29204100  | -1.33795600 | -0.00004500 |
| C | 6.17539000  | -1.54538400 | -0.00003900 |
| H | 6.19584300  | -2.63027600 | -0.00004600 |
| H | 6.09260100  | 2.35650200  | -0.00001400 |
| C | -4.86649400 | 0.56470400  | 0.00002400  |
| C | -6.11408700 | 1.27177300  | 0.00002500  |
| C | -7.30206500 | 0.60205500  | 0.00003100  |
| H | -8.23635500 | 1.15228200  | 0.00003100  |
| C | -7.33479500 | -0.82929300 | 0.00003500  |
| H | -8.29201000 | -1.33805600 | 0.00003900  |
| C | -6.17533300 | -1.54538000 | 0.00003300  |
| H | -6.19581400 | -2.63026400 | 0.00003600  |
| H | -6.09269900 | 2.35647300  | 0.00002100  |

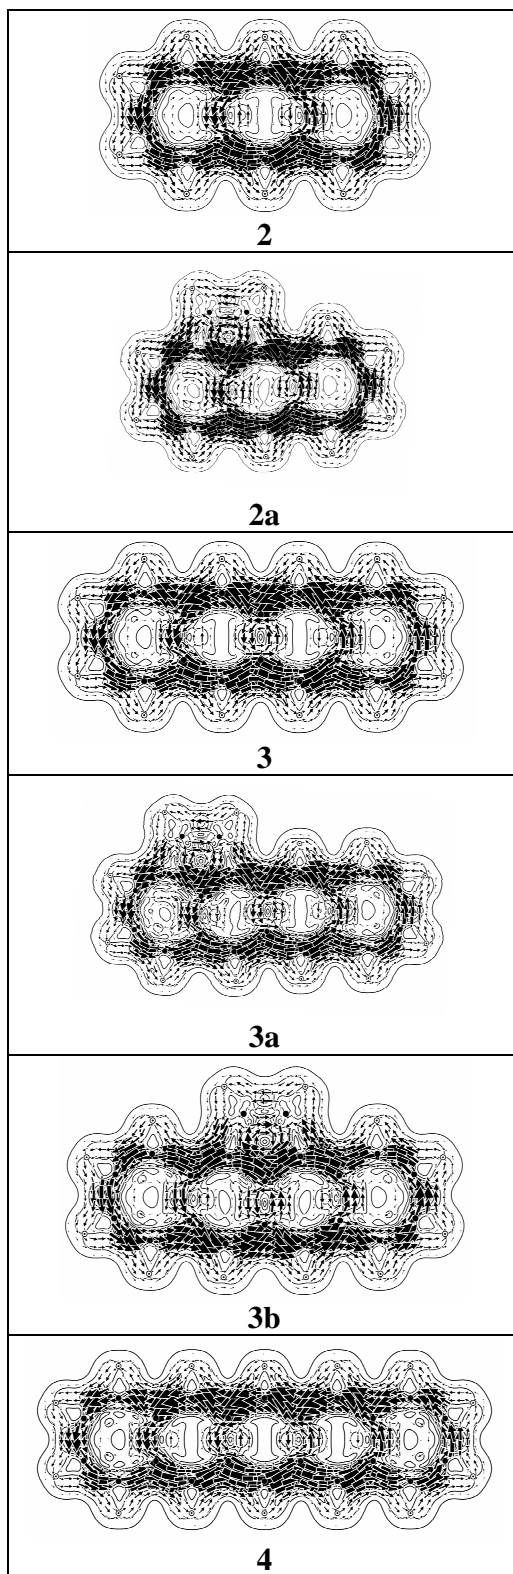

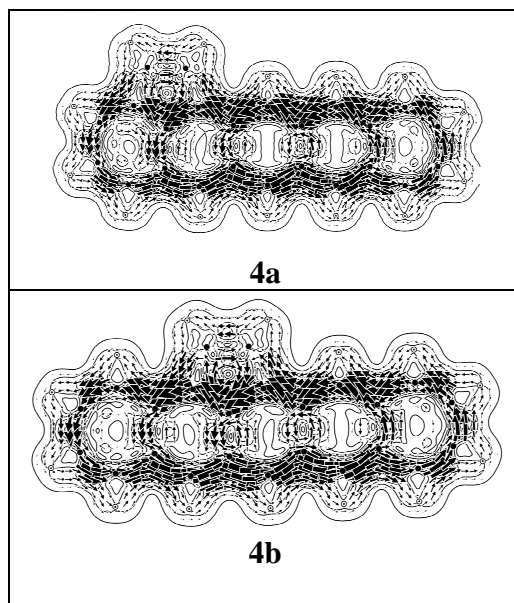

**Figure S1.** Ring current plots of the molecules studied obtained at the CTOCD-DZ/HF/6-31G/B3LYP/6-311+G(d,p) level.

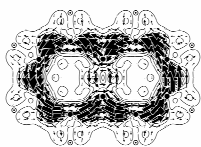

**1**

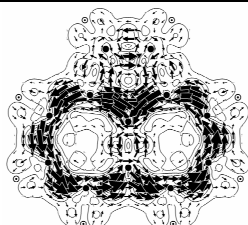

**1a**

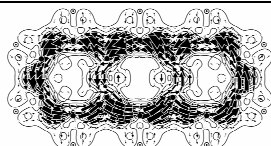

**2**

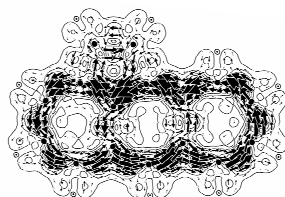

**2a**

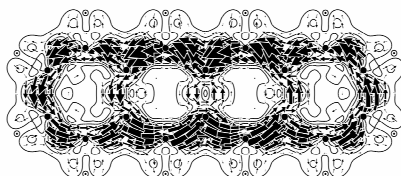

**3**

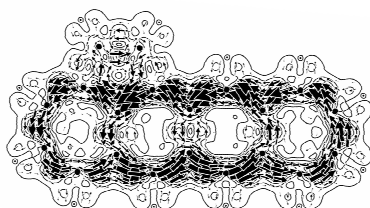

**3a**

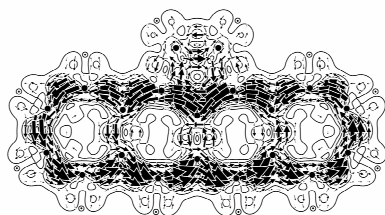

**3b**

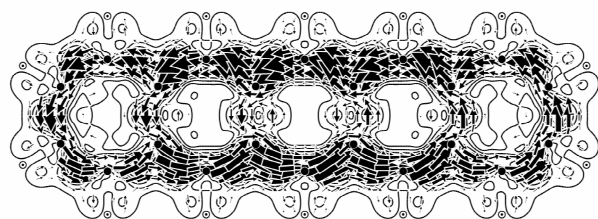

**4**

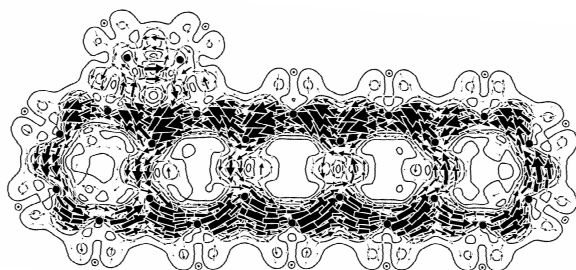

**4a**

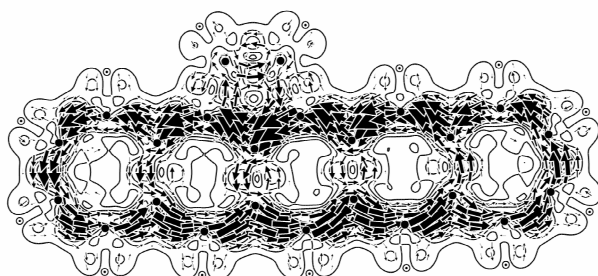

**4b**

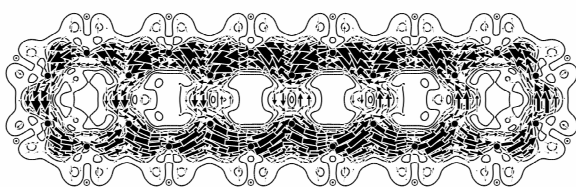

**5**



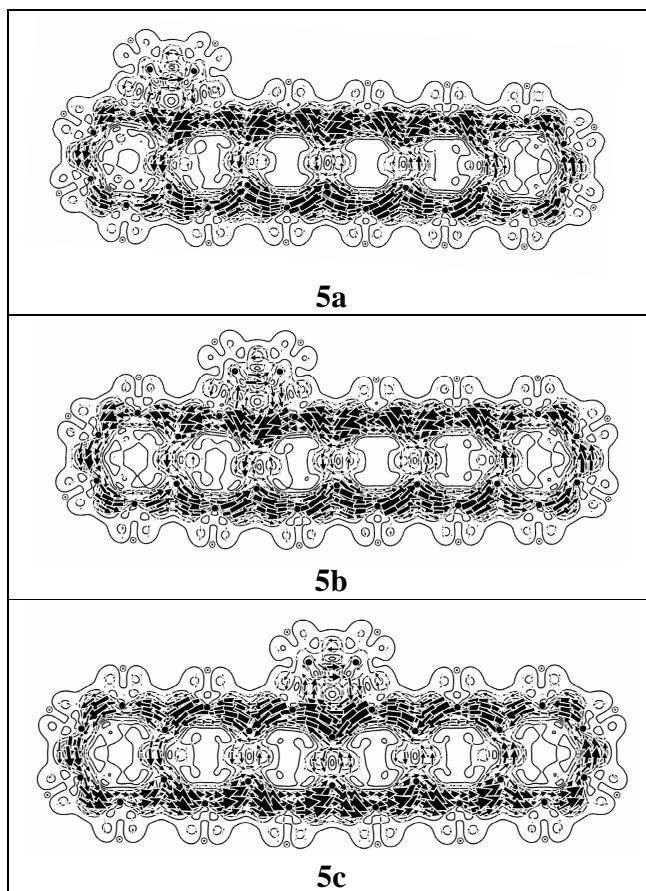

**Figure S2.** Ring current plots of the molecules studied obtained at the CTOCD-DZ/HF/STO-3G/B3LYP/6-311+G(d,p) level.

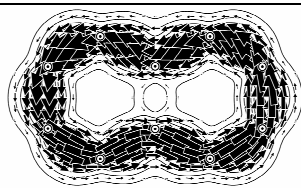

**1**

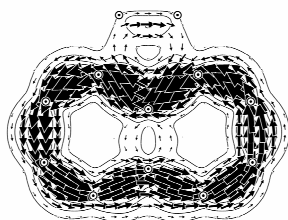

**1a**

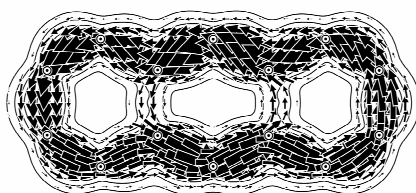

**2**

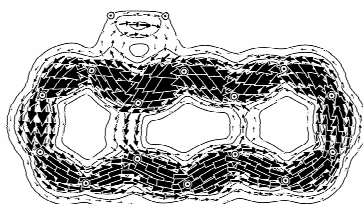

**2a**

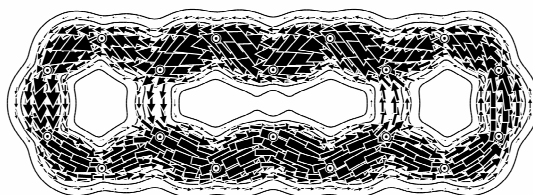

**3**

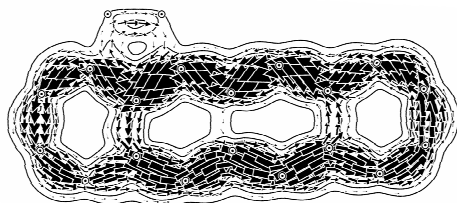

**3a**

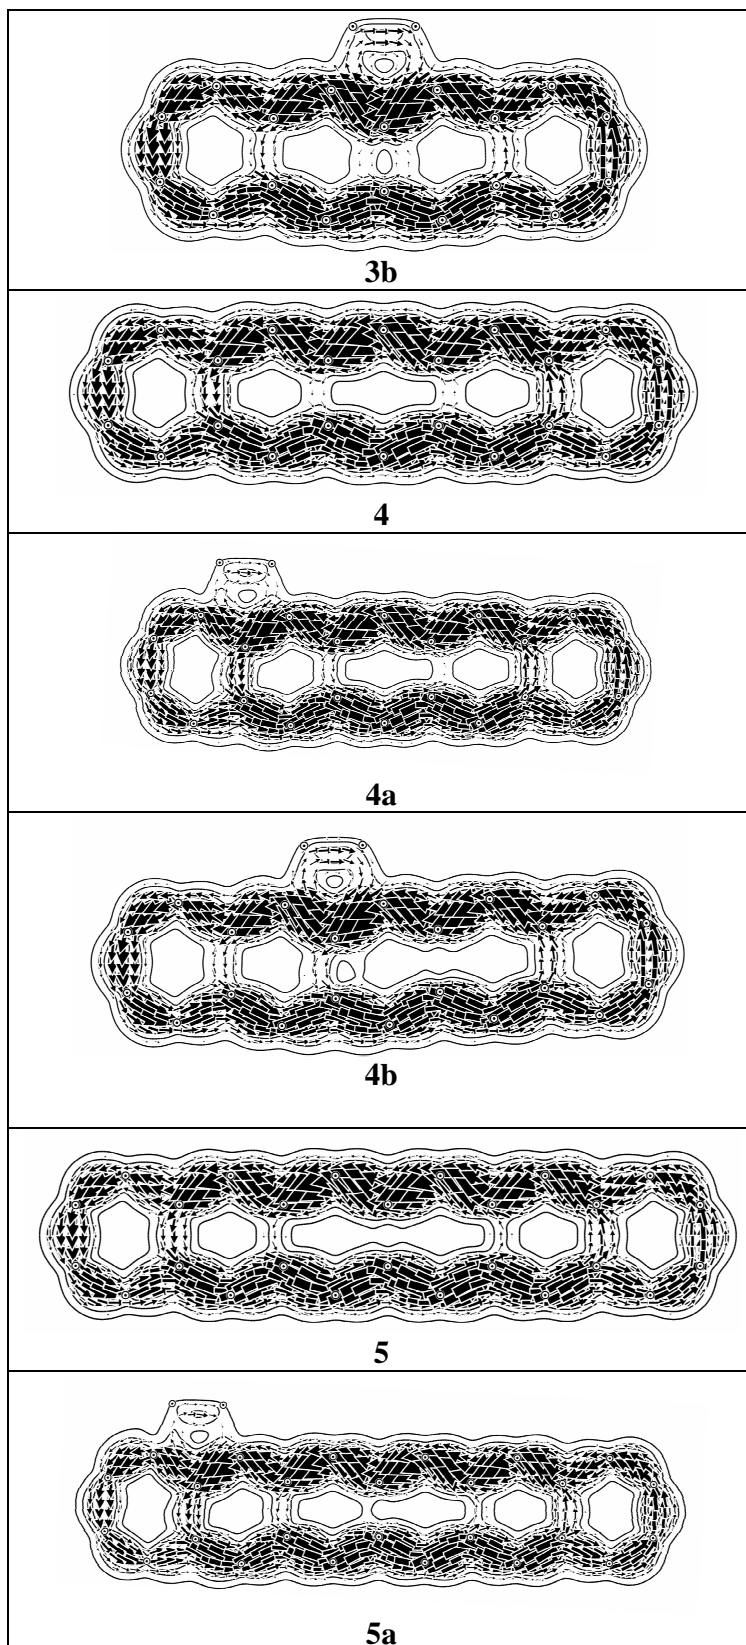

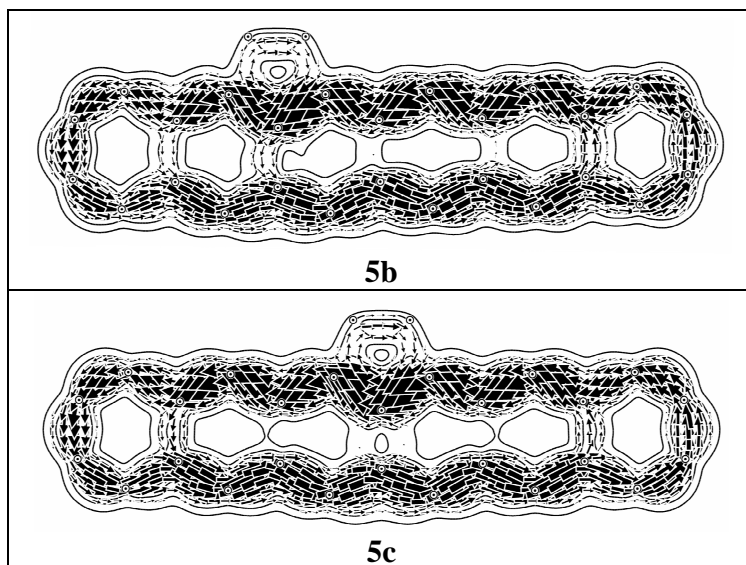

**Figure S3.** Ring current plots of the molecules studied obtained using the pseudo- $\pi$  method.

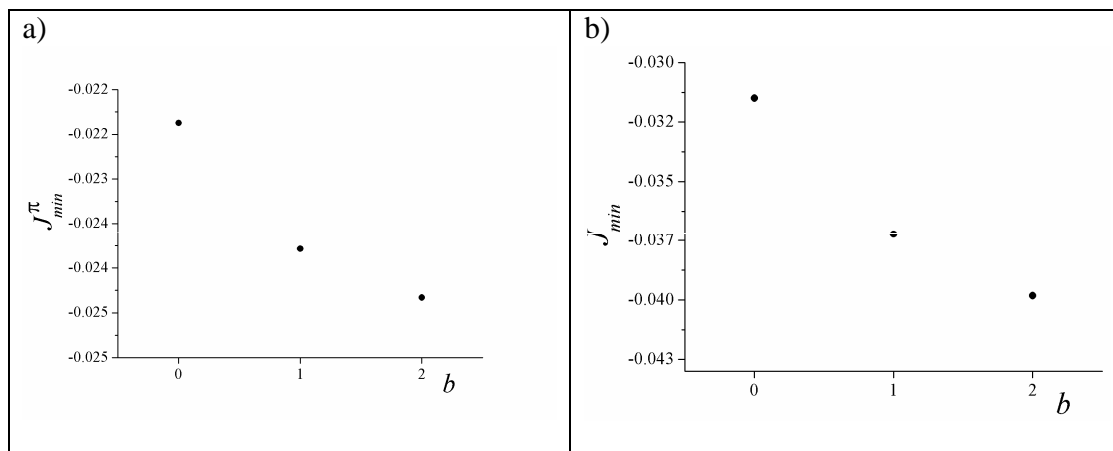

**Figure S4.** Dependence of the  $J_{min}^{\pi}$  and  $J_{min}$  of the  $\gamma$ -type C-C bonds obtained a) at the CT OCD-DZ/HF/STO-3G/B3LYP/6-311+G(d,p) level and b) with the pseudo- $\pi$  method, respectively, on the number  $b$  of hexagons in the series of molecules **5a**, **5b**, and **5c**. For details see text.
